# Supplementary material
Source: PubMed Central journal article supplement (PMC7042994)
Supplement: baADV2019001053-suppl1.pdf [file baADV2019001053-suppl1.pdf]

*KIR B* donors improve the outcome for AML patients given reduced intensity conditioning and unrelated donor transplantation

Supplemental Tables 1-3

| <b>Supplemental Table 1.<br/>Previous vs. Current Cohort.<br/>Demographics and Outcomes</b> | <b>JI Cohort<br/>1988-2009</b> | <b>Current Cohort<br/>2010-2016</b> |                               |
|---------------------------------------------------------------------------------------------|--------------------------------|-------------------------------------|-------------------------------|
|                                                                                             |                                |                                     |                               |
| Conditioning Intensity                                                                      | MAC (100%)*<br>N = 1532        | RIC (40%)<br>N = 1083               | MAC (60%)**<br>N = 1579       |
| Recipient Age (median)<br>% over age 60                                                     | 38<br>3%                       | 64<br>71%                           | 49<br>18%                     |
| Male (%)                                                                                    | 55%                            | 49%                                 | 52%                           |
| HLA allele match<br>8/8 (%)<br>7/8 (%)<br>>1 allele mismatch (%)                            | 92%<br>7%<br>1%                | 87%<br>13%<br>0%                    | 84%<br>16%<br>>1%             |
| Poor Risk Cytogenetics                                                                      | 25%                            | 19%                                 | 19%                           |
| KPS <90                                                                                     | 32%                            | 45%                                 | 30%                           |
| Graft Source: PBSC (%)                                                                      | 47%                            | 92%                                 | 81%                           |
| Donor Age (median)                                                                          | 34                             | 28                                  | 29                            |
| Advanced Disease status (%)                                                                 | 32%                            | 1%                                  | 2%                            |
| Recipient CMV Seropositive (%)                                                              | 54%                            | 65%                                 | 67%                           |
| GVHD Prophylaxis<br>TAC +/- others (%)<br>CSA +/- others (%)                                | 51%<br>46%                     | 83%<br>17%                          | 92%<br>8%                     |
| KIR B/x Donors (%)                                                                          | 67%                            | 69%                                 | 69%                           |
| Follow-up of Survivors<br>Median (range) months                                             | 60 (3-240)                     | 38 (6-99)                           | 44 (2-98)                     |
| <b>Outcomes</b>                                                                             |                                |                                     |                               |
| Overall Survival at 5 years (95% CI)                                                        | 32 (30-34)                     | 39 (36-43)                          | 49 (46-52)                    |
| DFS at 5 years (95% CI)                                                                     | 29 (26-31)                     | 35 (32-39)                          | 46 (43-38)                    |
| Relapse at 3 years (95% CI)                                                                 | 34 (32-37)                     | 34 (31-36)                          | 29 (27-31)                    |
| NRM at 1 year (95% CI)                                                                      | 27 (25-29)                     | 16 (14-18)                          | 15 (13-16)                    |
| <b>Donor KIR Bx association with<br/>outcomes in C1/x recipients</b>                        | <b>HR KIR Bx<br/>vs. AA*</b>   | <b>HR KIR Bx<br/>vs. AA</b>         | <b>HR KIR Bx<br/>vs. AA**</b> |

|         |                                 |                                |                               |
|---------|---------------------------------|--------------------------------|-------------------------------|
| Relapse | 0.70<br>(0.56-0.87)<br>P=0.0018 | 0.78<br>(0.62-0.98)<br>P=0.037 | 0.96<br>(0.78,1.19)<br>P=0.73 |
| DFS     | 0.78<br>(0.67-0.91)<br>P=0.0015 | 0.85<br>(0.72-0.99)<br>P=0.04  | 1.07<br>(0.89,1.29)<br>P=0.46 |

\*from Cooley, et al. (10)

\*\*in current MAC recipients no influence of KIR genotype was seen, in C1/x or others.

Supplemental Table 2. Multivariate Analysis

| 2A. Reduced Intensity Conditioning |     |       |      |        |          |               |
|------------------------------------|-----|-------|------|--------|----------|---------------|
| Overall Survival                   |     |       |      |        |          |               |
| Factor                             | N   | Event | HR   | HR Low | HR Upper | P             |
| Donor KIR haplotype                | .   | .     | .    | .      | .        | *0.069        |
| AA                                 | 336 | 197   | 1.00 | .      | .        | .             |
| BX                                 | 730 | 388   | 0.85 | 0.71   | 1.01     | 0.069         |
| HLA matched alleles                | .   | .     | .    | .      | .        | <b>0.0056</b> |
| 7/8                                | 146 | 100   | 1.00 | .      | .        | .             |
| 8/8                                | 920 | 485   | 0.69 | 0.53   | 0.90     | 0.0056        |
| Cytogenetics                       | .   | .     | .    | .      | .        | <b>*0.050</b> |
| Disease status                     | .   | .     | .    | .      | .        | <b>*0.030</b> |
| Early                              | 838 | 447   | 1.00 | .      | .        | .             |
| Intermediate                       | 219 | 130   | 1.19 | 0.98   | 1.44     | 0.079         |
| Advanced                           | 9   | 8     | 2.72 | 1.13   | 6.54     | 0.025         |
| Recipient age                      | .   | .     | .    | .      | .        | 0.089         |
| Recipient CMV status               | .   | .     | .    | .      | .        | 0.052         |
| GVHD prophylaxis                   | .   | .     | .    | .      | .        | <b>*0.037</b> |
| ATG/ alemtuzumab                   | .   | .     | .    | .      | .        | 0.84          |
| No ATG/ alemtuzumab                | 619 | 334   | 1.00 | .      | .        | .             |
| ATG alone                          | 404 | 225   | 1.03 | 0.83   | 1.29     | 0.75          |
| alemtuzumab alone                  | 43  | 26    | 1.13 | 0.70   | 1.83     | 0.62          |
| HLA-DP mismatch                    | .   | .     | .    | .      | .        | 0.49          |
| Fully matched                      | 178 | 109   | 1.00 | .      | .        | .             |
| Mismatch                           | 874 | 307   | 1.12 | 0.89   | 1.41     | 0.34          |

| 2B. Myeloablative Conditioning |      |       |      |        |          |                   |
|--------------------------------|------|-------|------|--------|----------|-------------------|
| Overall Survival               |      |       |      |        |          |                   |
| Factor                         | N    | Event | HR   | HR Low | HR Upper | P                 |
| Donor KIR haplotype            | .    | .     | .    | .      | .        | *0.61             |
| AA                             | 491  | 229   | 1.00 | .      | .        | .                 |
| BX                             | 1066 | 504   | 1.05 | 0.88   | 1.24     | 0.61              |
| HLA matched alleles            | .    | .     | .    | .      | .        | <b>0.0007</b>     |
| 7/8                            | 245  | 134   | 1.00 | .      | .        | .                 |
| 8/8                            | 1312 | 599   | 0.71 | 0.58   | 0.87     | 0.0007            |
| Cytogenetics                   | .    | .     | .    | .      | .        | <b>*0.0023</b>    |
| Disease status                 | .    | .     | .    | .      | .        | <b>*&lt;.0001</b> |
| Early                          | 1152 | 529   | 1.00 | .      | .        | .                 |
| Intermediate                   | 373  | 181   | 1.17 | 0.99   | 1.38     | 0.058             |
| Advanced                       | 32   | 23    | 2.52 | 1.71   | 3.71     | <.0001            |
| Recipient age                  | .    | .     | .    | .      | .        | <b>0.0014</b>     |
| Recipient CMV status           | .    | .     | .    | .      | .        | 0.14              |
| GVHD prophylaxis               | .    | .     | .    | .      | .        | <b>*&lt;.0001</b> |
| ATG/ alemtuzumab               | .    | .     | .    | .      | .        | <b>0.044</b>      |
| No ATG/ alemtuzumab            | 936  | 443   | 1.00 | .      | .        | .                 |
| ATG alone                      | 590  | 275   | 1.01 | 0.85   | 1.18     | 0.95              |
| alemtuzumab alone              | 31   | 15    | 0.44 | 0.23   | 1.85     | 0.015             |
| HLA-DP mismatch                | .    | .     | .    | .      | .        | 0.52              |
| Fully matched                  | 265  | 141   | 1.00 | .      | .        | .                 |
| Mismatch                       | 1270 | 593   | 0.97 | 0.80   | 1.18     | 0.77              |

|         |    |   |      |      |      |      |
|---------|----|---|------|------|------|------|
| Missing | 13 | 9 | 1.29 | 0.63 | 2.65 | 0.49 |
|---------|----|---|------|------|------|------|

|         |    |    |      |      |      |      |
|---------|----|----|------|------|------|------|
| Missing | 19 | 10 | 0.96 | 0.47 | 1.96 | 0.91 |
|---------|----|----|------|------|------|------|

| Factor                                            | N   | Event | HR   | HR Low | HR Upper | P             |
|---------------------------------------------------|-----|-------|------|--------|----------|---------------|
| Donor KIR centromeric regions                     | .   | .     | .    | .      | .        | 0.20          |
| AA                                                | 485 | 279   | 1.00 | .      | .        | .             |
| AB                                                | 483 | 259   | 0.87 | 0.73   | 1.03     | 0.1030        |
| BB                                                | 98  | 47    | 0.80 | 0.58   | 1.10     | 0.1613        |
| HLA matched alleles                               | .   | .     | .    | .      | .        | <b>0.0085</b> |
| 7/8                                               | 146 | 100   | 1.00 | .      | .        | .             |
| 8/8                                               | 920 | 485   | 0.70 | 0.53   | 0.91     | 0.0085        |
| Cytogenetics                                      | .   | .     | .    | .      | .        | <b>0.046</b>  |
| Disease status                                    | .   | .     | .    | .      | .        | <b>*0.027</b> |
| Early                                             | 838 | 447   | 1.00 | .      | .        | .             |
| Intermediate                                      | 219 | 130   | 1.20 | 0.99   | 1.45     | 0.0633        |
| Advanced                                          | 9   | 8     | 2.72 | 1.12   | 6.63     | 0.0273        |
| Recipient age                                     | .   | .     | .    | .      | .        | 0.11          |
| Recipient CMV status                              | .   | .     | .    | .      | .        | 0.071         |
| GVHD prophylaxis                                  | .   | .     | .    | .      | .        | <b>*0.036</b> |
| ATG/ alemtuzumab                                  | .   | .     | .    | .      | .        | 0.82          |
| No ATG/ alemtuzumab                               | 619 | 334   | 1.00 | .      | .        | .             |
| ATG alone                                         | 404 | 225   | 1.03 | 0.83   | 1.27     | 0.82          |
| alemtuzumab alone                                 | 43  | 26    | 1.15 | 0.72   | 1.84     | 0.56          |
| HLA-DP Mismatch                                   | .   | .     | .    | .      | .        | 0.47          |
| Fully matched                                     | 178 | 109   | 1.00 | .      | .        | .             |
| Mismatch                                          | 874 | 307   | 1.12 | 0.89   | 1.40     | 0.34          |
| Missing                                           | 13  | 9     | 1.31 | 0.65   | 2.61     | 0.45          |
| Stratified variables: Karnofsky Performance score |     |       |      |        |          |               |

| Factor                                            | N    | Event | HR   | HR Low | HR Upper | P                 |
|---------------------------------------------------|------|-------|------|--------|----------|-------------------|
| Donor KIR centromeric regions                     | .    | .     | .    | .      | .        | 0.96              |
| AA                                                | 747  | 358   | 1.00 | .      | .        | .                 |
| AB                                                | 647  | 300   | 0.99 | 0.83   | 1.19     | 0.9481            |
| BB                                                | 163  | 75    | 1.03 | 0.82   | 1.29     | 0.8126            |
| HLA matched alleles                               | .    | .     | .    | .      | .        | <b>0.0007</b>     |
| 7/8                                               | 245  | 134   | 1.00 | .      | .        | .                 |
| 8/8                                               | 1312 | 599   | 0.71 | 0.58   | 0.87     | 0.0007            |
| Cytogenetics                                      | .    | .     | .    | .      | .        | <b>0.0022</b>     |
| Disease status                                    | .    | .     | .    | .      | .        | <b>*&lt;.0001</b> |
| Early                                             | 1152 | 529   | 1.00 | .      | .        | .                 |
| Intermediate                                      | 373  | 181   | 1.17 | 0.99   | 1.38     | 0.0627            |
| Advanced                                          | 32   | 23    | 2.54 | 1.72   | 3.75     | 0.0000            |
| Recipient age                                     | .    | .     | .    | .      | .        | <b>*0.0013</b>    |
| Recipient CMV status                              | .    | .     | .    | .      | .        | 0.14              |
| GVHD prophylaxis                                  | .    | .     | .    | .      | .        | <b>*&lt;.0001</b> |
| ATG/ alemtuzumab                                  | .    | .     | .    | .      | .        | <b>*0.038</b>     |
| No ATG/ alemtuzumab                               | 936  | 443   | 1.00 | .      | .        | .                 |
| ATG alone                                         | 590  | 275   | 1.01 | 0.86   | 1.18     | 0.92              |
| alemtuzumab alone                                 | 31   | 15    | 0.44 | 0.23   | 0.84     | <b>0.0023</b>     |
| HLA-DP mismatch                                   | .    | .     | .    | .      | .        | 0.96              |
| Fully matched                                     | 268  | 141   | 1.00 | .      | .        | .                 |
| Mismatch                                          | 1270 | 593   | 0.97 | 0.80   | 1.18     | 0.79              |
| Missing                                           | 19   | 10    | 0.96 | 0.47   | 1.96     | 0.91              |
| Stratified variables: Karnofsky Performance score |      |       |      |        |          |                   |

Adjusted multivariate analysis for the endpoints shown stratified as indicated.

\*Represents overall p value for the variable group; **Bolded p values** are independently significant  $p < 0.05$

**Supplemental Table 3** Individual Donor KIR B Genes: Influence on Outcome.

**Table 3A. Donor KIR B genes and Relapse, DFS and Survival**

| RIC                |     |      |             |               | MAC                |     |      |             |      |
|--------------------|-----|------|-------------|---------------|--------------------|-----|------|-------------|------|
| Relapse            |     |      |             |               | Relapse            |     |      |             |      |
| Donor KIR Group    | N   | RR   | 95% CI      | P             | Donor KIR Group    | N   | RR   | 95% CI      | P    |
| KIR A/A            | 334 | 1    |             |               | KIR A/A            | 490 | 1    |             |      |
| KIR B/x with 2DS1+ | 381 | 0.75 | (0.60-0.95) | 0.016         | KIR B/x with 2DS1+ | 601 | 0.96 | (0.77-1.21) | 0.74 |
| KIR B/x with 2DS2+ | 558 | 0.73 | (0.57-0.93) | 0.010         | KIR B/x with 2DS2+ | 780 | 0.94 | (0.77-1.14) | 0.51 |
| KIR B/x with 2DS3+ | 287 | 0.61 | (0.47-0.79) | <b>0.0001</b> | KIR B/x with 2DS3+ | 412 | 1.00 | (0.78-1.28) | 0.99 |
| KIR B/x with 2DS5+ | 292 | 0.77 | (0.61-0.98) | 0.037         | KIR B/x with 2DS5+ | 485 | 1.00 | (0.80-1.24) | 0.97 |
| KIR B/x with 2DL2+ | 554 | 0.72 | (0.56-0.93) | 0.010         | KIR B/x with 2DL2+ | 775 | 0.93 | (0.77-1.13) | 0.48 |
| KIR B/x with 2DL5+ | 489 | 0.70 | (0.56-0.87) | <b>0.0016</b> | KIR B/x with 2DL5+ | 757 | 0.97 | (0.79-1.19) | 0.76 |
| KIR B/x with 3DS1+ | 369 | 0.75 | (0.60-0.95) | 0.016         | KIR B/x with 3DS1+ | 589 | 1.03 | (0.83-1.28) | 0.77 |
|                    |     |      |             |               |                    |     |      |             |      |
| DFS                |     |      |             |               | DFS                |     |      |             |      |
|                    |     |      |             |               |                    |     |      |             |      |
| Donor KIR Group    | N   | RR   | 95% CI      | P             | Donor KIR Group    | N   | RR   | 95% CI      | P    |
| KIR A/A            | 334 | 1    |             |               | KIR A/A            | 489 | 1    |             |      |
| KIR B/x with 2DS1+ | 381 | 0.87 | (0.73-1.03) | 0.10          | KIR B/x with 2DS1+ | 600 | 1.06 | (0.90-1.26) | 0.47 |
| KIR B/x with 2DS2+ | 557 | 0.80 | (0.66-0.97) | 0.020         | KIR B/x with 2DS2+ | 778 | 1.07 | (0.90-1.26) | 0.44 |
| KIR B/x with 2DS3+ | 287 | 0.76 | (0.62-0.92) | <b>0.0054</b> | KIR B/x with 2DS3+ | 412 | 1.09 | (0.89-1.33) | 0.42 |
| KIR B/x with 2DS5+ | 292 | 0.86 | (0.72-1.03) | 0.10          | KIR B/x with 2DS5+ | 484 | 1.05 | (0.89-1.24) | 0.58 |
| KIR B/x with 2DL2+ | 554 | 0.80 | (0.66-0.97) | 0.025         | KIR B/x with 2DL2+ | 773 | 1.08 | (0.91-1.27) | 0.39 |
| KIR B/x with 2DL5+ | 489 | 0.83 | (0.69-0.99) | 0.037         | KIR B/x with 2DL5+ | 756 | 1.07 | (0.91-1.25) | 0.40 |
| KIR B/x with 3DS1+ | 369 | 0.85 | (0.71-1.01) | 0.066         | KIR B/x with 3DS1+ | 588 | 1.11 | (0.94-1.31) | 0.20 |

**Supplemental Table 3 A.**

| RIC      |  |  |  |  | MAC      |  |  |  |  |
|----------|--|--|--|--|----------|--|--|--|--|
| Survival |  |  |  |  | Survival |  |  |  |  |
|          |  |  |  |  |          |  |  |  |  |

| <b>Donor KIR Group</b> | <b>N</b> | <b>RR</b> | <b>95% CI</b> | <b>P</b> | <b>Donor KIR Group</b> | <b>N</b> | <b>RR</b> | <b>95% CI</b> | <b>P</b> |
|------------------------|----------|-----------|---------------|----------|------------------------|----------|-----------|---------------|----------|
| KIR A/A                | 336      | 1         |               |          | KIR A/A                | 491      | 1         |               |          |
| KIR B/x with 2DS1+     | 381      | 0.91      | (0.75-1.10)   | 0.31     | KIR B/x with 2DS1+     | 605      | 1.02      | (0.86-1.22)   | 0.80     |
| KIR B/x with 2DS2+     | 557      | 0.82      | (0.67-1.00)   | 0.055    | KIR B/x with 2DS2+     | 784      | 1.05      | (0.88-1.26)   | 0.58     |
| KIR B/x with 2DS3+     | 287      | 0.81      | (0.65-1.01)   | 0.056    | KIR B/x with 2DS3+     | 414      | 1.03      | (0.83-1.28)   | 0.78     |
| KIR B/x with 2DS5+     | 292      | 0.88      | (0.72-1.09)   | 0.24     | KIR B/x with 2DS5+     | 488      | 1.02      | (0.84-1.23)   | 0.85     |
| KIR B/x with 2DL2+     | 554      | 0.82      | (0.67-1.01)   | 0.058    | KIR B/x with 2DL2+     | 779      | 1.06      | (0.88-1.28)   | 0.52     |
| KIR B/x with 2DL5+     | 489      | 0.86      | (0.71-1.05)   | 0.13     | KIR B/x with 2DL5+     | 762      | 1.03      | (0.87-1.22)   | 0.75     |
| KIR B/x with 3DS1+     | 369      | 0.89      | (0.73-1.08)   | 0.24     | KIR B/x with 3DS1+     | 594      | 1.06      | (0.89-1.27)   | 0.51     |

**Bolded p values** are independently significant  $p < 0.05/7 = 0.007$

**Table 3B. Donor KIR B genes in Recipients with C1/x and Outcome**

| <b>RIC with Recipient C1/x</b> |          |           |               |               | <b>MAC with Recipient C1/x</b> |          |           |               |          |
|--------------------------------|----------|-----------|---------------|---------------|--------------------------------|----------|-----------|---------------|----------|
| <b>Relapse</b>                 |          |           |               |               | <b>Relapse</b>                 |          |           |               |          |
| <b>Donor KIR Group</b>         | <b>N</b> | <b>RR</b> | <b>95% CI</b> | <b>P</b>      | <b>Donor KIR Group</b>         | <b>N</b> | <b>RR</b> | <b>95% CI</b> | <b>P</b> |
| KIR A/A                        | 302      | 1         |               |               | KIR A/A                        | 405      | 1         |               |          |
| KIR B/x with 2DS1+             | 329      | 0.72      | (0.56-0.94)   | 0.014         | KIR B/x with 2DS1+             | 512      | 0.94      | (0.73-1.23)   | 0.66     |
| KIR B/x with 2DS2+             | 486      | 0.74      | (0.57-0.95)   | 0.020         | KIR B/x with 2DS2+             | 665      | 0.95      | (0.76-1.19)   | 0.64     |
| KIR B/x with 2DS3+             | 240      | 0.60      | (0.45-0.78)   | <b>0.0002</b> | KIR B/x with 2DS3+             | 357      | 0.93      | (0.68-1.25)   | 0.62     |
| KIR B/x with 2DS5+             | 250      | 0.76      | (0.58-0.99)   | 0.043         | KIR B/x with 2DS5+             | 413      | 1.01      | (0.77-1.31)   | 0.95     |
| KIR B/x with 2DL2+             | 482      | 0.73      | (0.57-0.95)   | 0.020         | KIR B/x with 2DL2+             | 662      | 0.95      | (0.75-1.18)   | 0.63     |
| KIR B/x with 2DL5+             | 418      | 0.70      | (0.56-0.88)   | <b>0.0021</b> | KIR B/x with 2DL5+             | 646      | 0.93      | (0.73-1.20)   | 0.59     |
| KIR B/x with 3DS1+             | 317      | 0.74      | (0.57-0.95)   | 0.018         | KIR B/x with 3DS1+             | 502      | 1.00      | (0.77-1.29)   | 0.99     |
|                                |          |           |               |               |                                |          |           |               |          |
| <b>DFS</b>                     |          |           |               |               | <b>DFS</b>                     |          |           |               |          |
| <b>Donor KIR Group</b>         | <b>N</b> | <b>RR</b> | <b>95% CI</b> | <b>P</b>      | <b>Donor KIR Group</b>         | <b>N</b> | <b>RR</b> | <b>95% CI</b> | <b>P</b> |
| KIR A/A                        | 302      | 1         |               |               | KIR A/A                        | 404      | 1         |               |          |



|                        |          |           |               |              |  |                        |          |           |               |          |
|------------------------|----------|-----------|---------------|--------------|--|------------------------|----------|-----------|---------------|----------|
| KIR B/x with 2DS1+     | 329      | 0.87      | (0.73-1.03)   | 0.11         |  | KIR B/x with 2DS1+     | 511      | 1.04      | (0.84-1.27)   | 0.73     |
| KIR B/x with 2DS2+     | 486      | 0.80      | (0.66-0.97)   | 0.027        |  | KIR B/x with 2DS2+     | 663      | 1.08      | (0.89-1.32)   | 0.43     |
| KIR B/x with 2DS3+     | 240      | 0.75      | (0.60-0.93)   | 0.0081       |  | KIR B/x with 2DS3+     | 357      | 1.06      | (0.83-1.35)   | 0.64     |
| KIR B/x with 2DS5+     | 250      | 0.88      | (0.73-1.07)   | 0.20         |  | KIR B/x with 2DS5+     | 412      | 1.05      | (0.86-1.30)   | 0.62     |
| KIR B/x with 2DL2+     | 482      | 0.80      | (0.66-0.98)   | 0.031        |  | KIR B/x with 2DL2+     | 660      | 1.09      | (0.90-1.33)   | 0.38     |
| KIR B/x with 2DL5+     | 418      | 0.84      | (0.70-1.01)   | 0.057        |  | KIR B/x with 2DL5+     | 645      | 1.05      | (0.87-1.28)   | 0.62     |
| KIR B/x with 3DS1+     | 317      | 0.86      | (0.72-1.02)   | 0.085        |  | KIR B/x with 3DS1+     | 501      | 1.07      | (0.88-1.32)   | 0.50     |
|                        |          |           |               |              |  |                        |          |           |               |          |
|                        |          |           |               |              |  |                        |          |           |               |          |
| <b>Survival</b>        |          |           |               |              |  | <b>Survival</b>        |          |           |               |          |
|                        |          |           |               |              |  |                        |          |           |               |          |
| <b>Donor KIR Group</b> | <b>N</b> | <b>RR</b> | <b>95% CI</b> | <b>P</b>     |  | <b>Donor KIR Group</b> | <b>N</b> | <b>RR</b> | <b>95% CI</b> | <b>P</b> |
| KIR A/A                | 304      | 1         |               |              |  | KIR A/A                | 406      |           | 1             |          |
| KIR B/x with 2DS1+     | 329      | 0.88      | (0.72-1.06)   | 0.18         |  | KIR B/x with 2DS1+     | 515      | 1.02      | (0.82-1.26)   | 0.86     |
| KIR B/x with 2DS2+     | 486      | 0.80      | (0.65-0.98)   | <b>0.029</b> |  | KIR B/x with 2DS2+     | 667      | 1.08      | (0.88-1.32)   | 0.47     |
| KIR B/x with 2DS3+     | 240      | 0.75      | (0.59-0.96)   | <b>0.022</b> |  | KIR B/x with 2DS3+     | 357      | 1.03      | (0.80-1.32)   | 0.83     |
| KIR B/x with 2DS5+     | 250      | 0.87      | (0.70-1.08)   | 0.20         |  | KIR B/x with 2DS5+     | 416      | 1.04      | (0.83-1.30)   | 0.74     |
| KIR B/x with 2DL2+     | 482      | 0.79      | (0.64-0.97)   | <b>0.025</b> |  | KIR B/x with 2DL2+     | 664      | 1.09      | (0.88-1.35)   | 0.43     |
| KIR B/x with 2DL5+     | 418      | 0.83      | (0.68-1.02)   | 0.075        |  | KIR B/x with 2DL5+     | 649      | 1.03      | (0.84-1.27)   | 0.75     |
| KIR B/x with 3DS1+     | 317      | 0.86      | (0.71-1.05)   | 0.15         |  | KIR B/x with 3DS1+     | 505      | 1.07      | (0.86-1.32)   | 0.56     |

**Bolded p values** are independently significant  $p < 0.05/7 = 0.007$
